# Supplementary material for: Consecutive introduction of Ag(i)to an anionic homoleptic Co(iii) complex: variable Ag(i) coordination mode
Source: Royal Society of Chemistry journal article supplement (doi:10.1039/c6ce00276e), 2016-01-01
Supplement: c6ce00276e1.pdf [file c6ce00276e1.pdf]

Electronic Supporting Information

**Consecutive Introduction of Ag(I) to an Anionic Homoleptic Co(III) complex: Variable Ag(I)  
Coordination Mode**

*Giriteja Illa, Pardhasaradhi Satha, Chandra Shekhar Purohit\**

School of Chemical Sciences, National Institute of Science Education and Research, Bhubaneswar,  
Odisha, India.

**Contents**

|                                                                                                                         |     |
|-------------------------------------------------------------------------------------------------------------------------|-----|
| 1. Synthetic schemes .....                                                                                              | S2  |
| 2. Fig. S1. <sup>1</sup> HNMR and <sup>13</sup> CNMR spectra of compound <b>1</b> .....                                 | S3  |
| 3. Fig. S2. <sup>1</sup> HNMR and <sup>13</sup> CNMR spectra of compound <b>H<sub>2</sub>L</b> .....                    | S4  |
| 4. Fig. S3. <sup>1</sup> HNMR and <sup>13</sup> CNMR spectra of [ <b>CoL<sub>2</sub></b> ] <b>Bu<sub>4</sub>N</b> ..... | S5  |
| 5. Fig. S4. ESI-MS spectrum of Dimethyl pyrazine-2,6-dicarboxylate.....                                                 | S6  |
| 6. Fig. S4. ESI-MS spectrum of compound <b>1</b> .....                                                                  | S6  |
| 7. Fig. S4. ESI-MS spectrum of [ <b>CoL<sub>2</sub></b> ] <b>Bu<sub>4</sub>N</b> .....                                  | S7  |
| 5. Bond lengths and Bond angles of [ <b>CoL<sub>2</sub></b> ] <b>Bu<sub>4</sub>N</b> , <b>2</b> .....                   | S7  |
| 6. Bond lengths and Bond angles of <b>3</b> .....                                                                       | S8  |
| 7. Bond lengths and Bond angles of <b>4</b> .....                                                                       | S9  |
| 8. Bond lengths and Bond angles of <b>5</b> .....                                                                       | S11 |

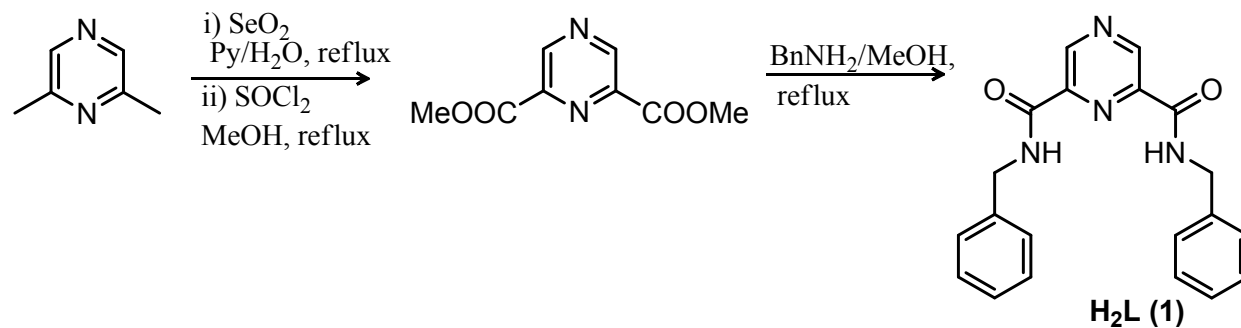

Scheme S1. Synthesis of ligand **H<sub>2</sub>L**

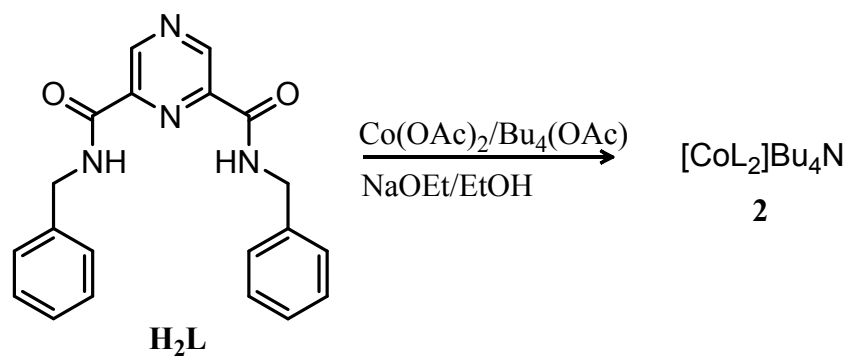

Scheme S2. Synthesis of Co(III) complex

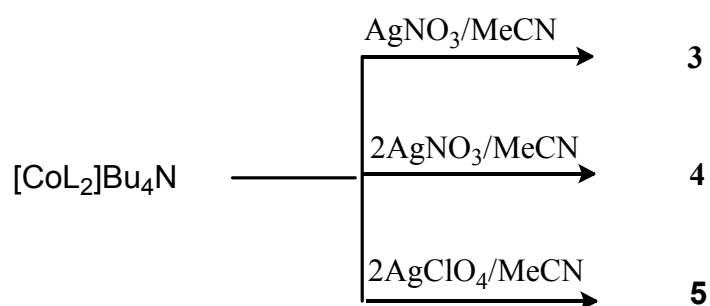

Scheme S3. Synthesis of heterobimetallic Co(III), Ag(I) complexes

Fig. S1  $^1\text{H}$  NMR &  $^{13}\text{C}$  NMR of Dimethyl pyrazine-2,6-dicarboxylate

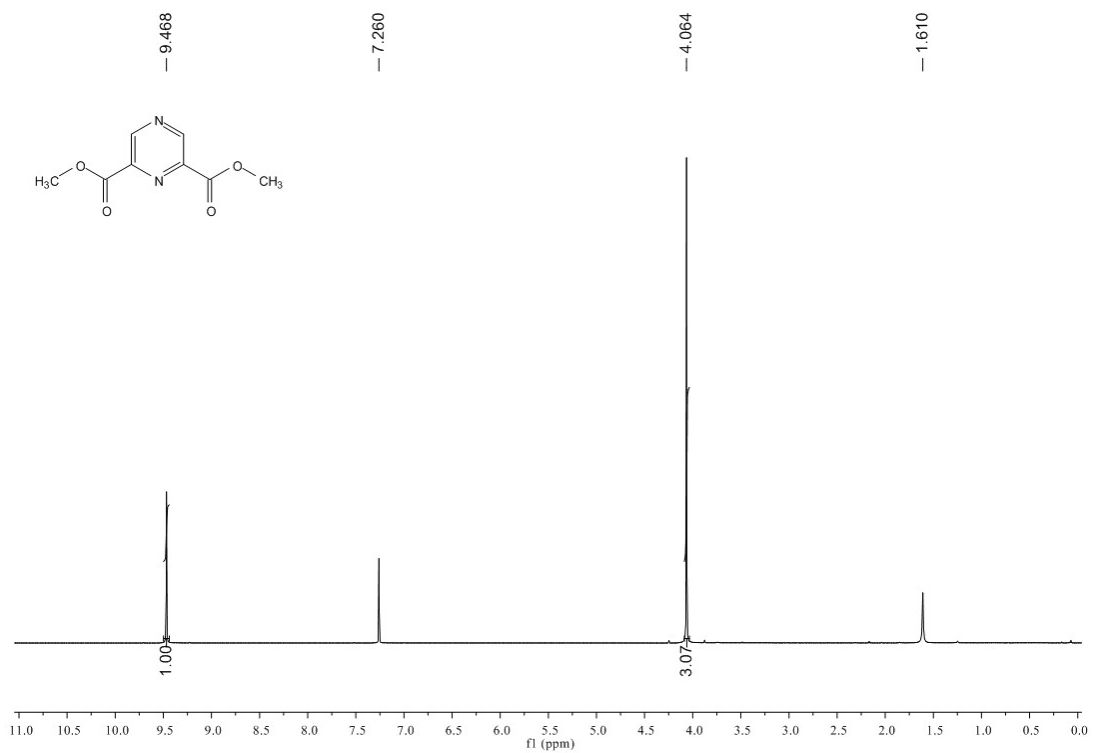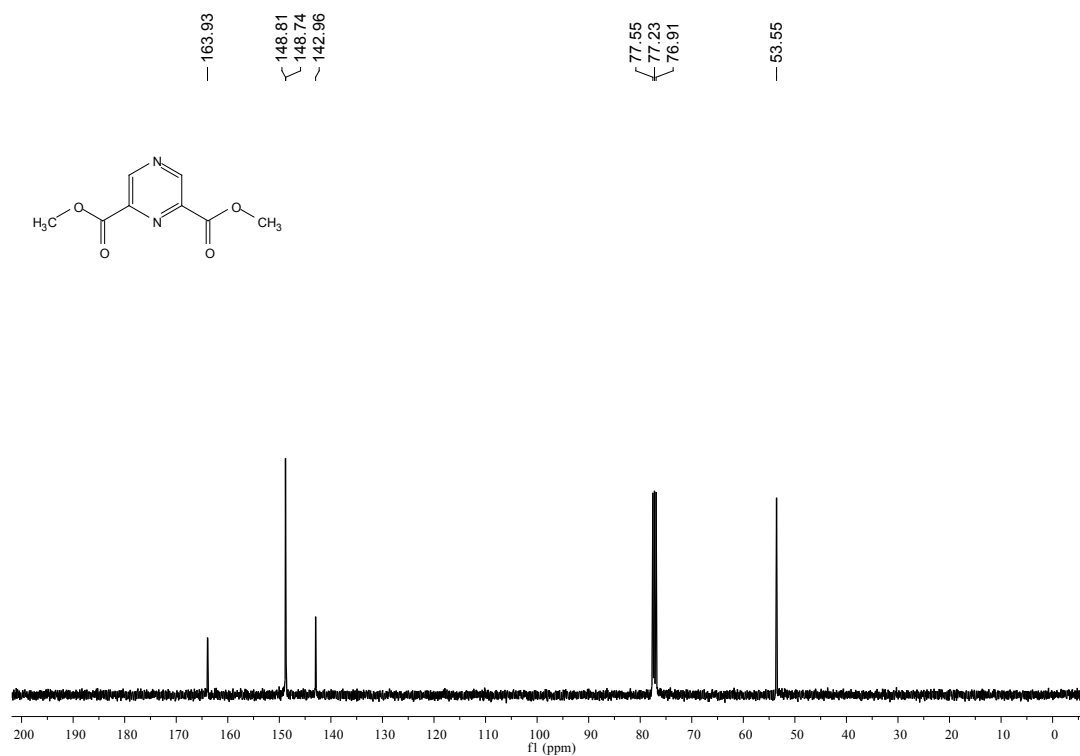

**Fig. S2**  $^1\text{H}$  NMR &  $^{13}\text{C}$  NMR of Compound **H<sub>2</sub>L**

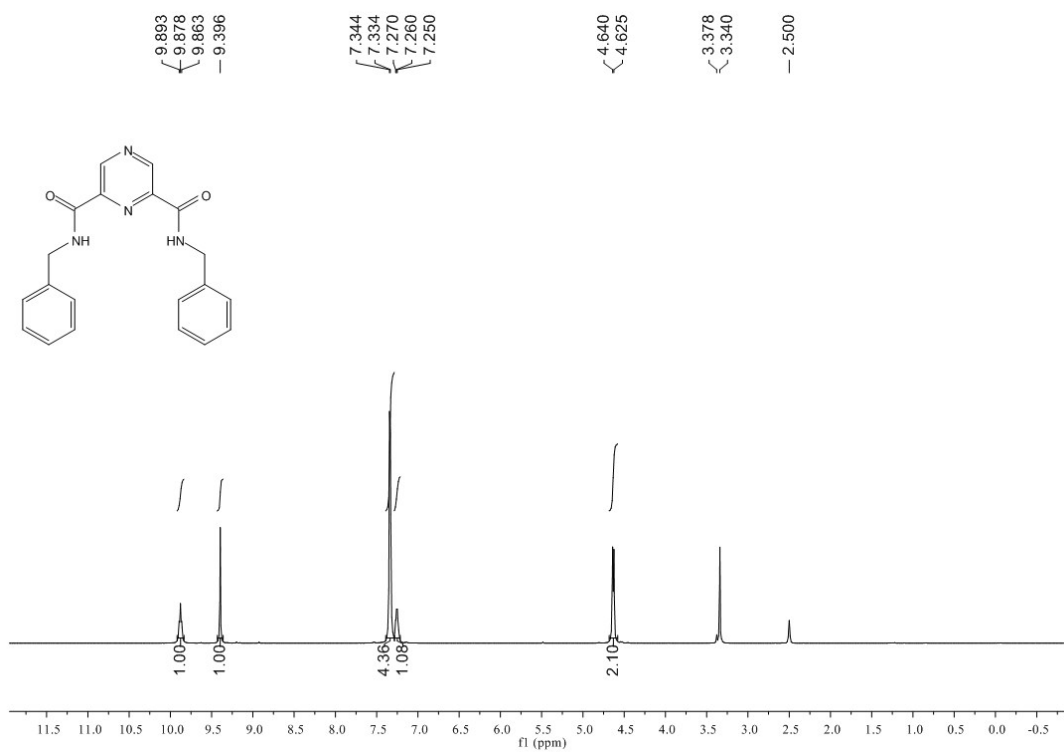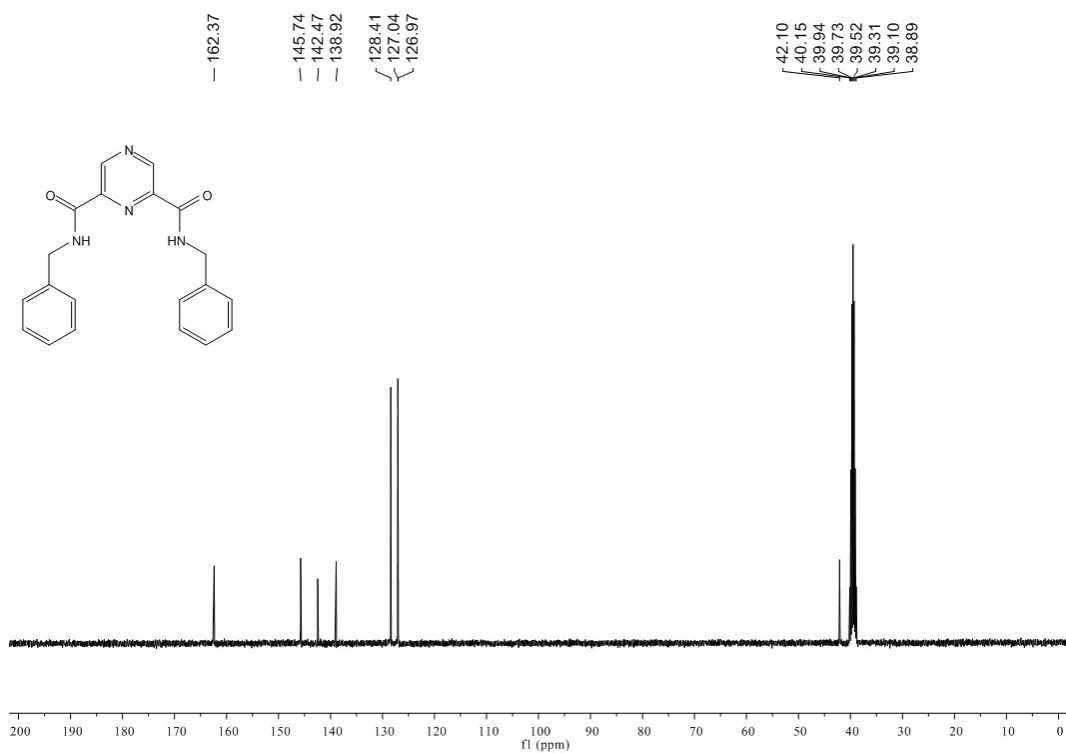

**Fig. S3**  $^1\text{H}$  NMR &  $^{13}\text{C}$  NMR of  $[\text{CoL}_2]\text{Bu}_4\text{N}$

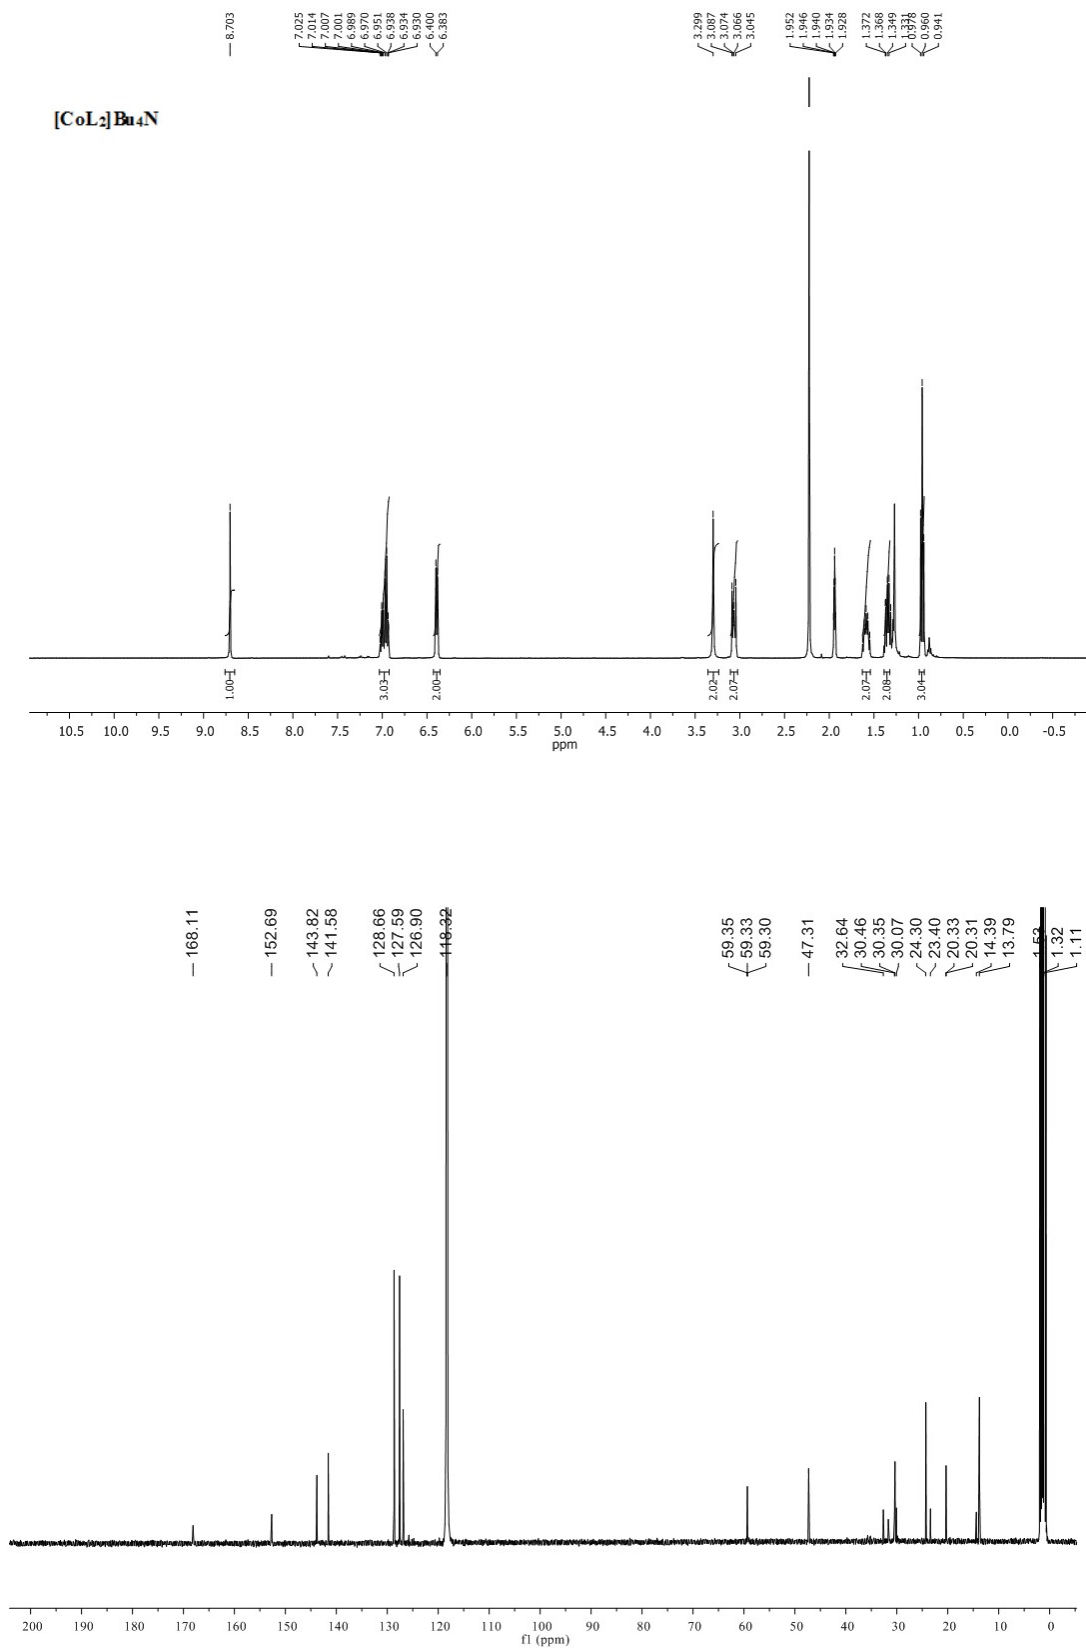

**Fig. S4** ESI-MS spectrum of Dimethyl pyrazine-2,6-dicarboxylate

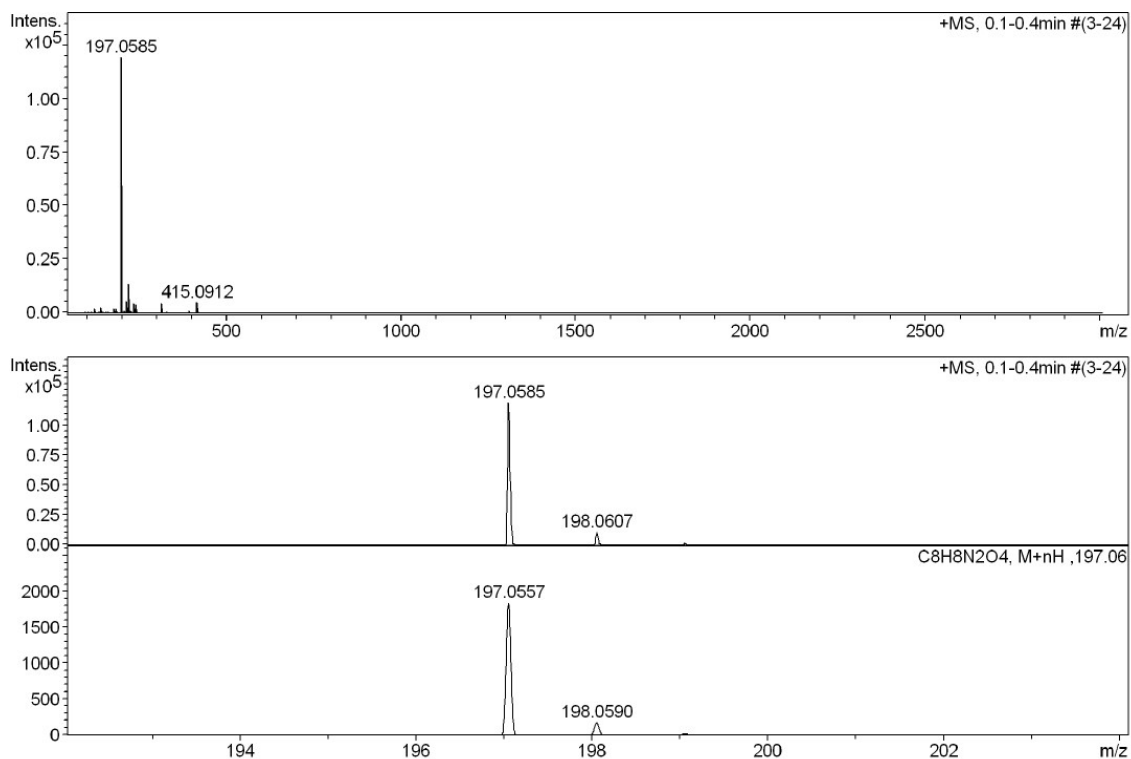

**Fig. S5** ESI-MS spectrum of compound 1

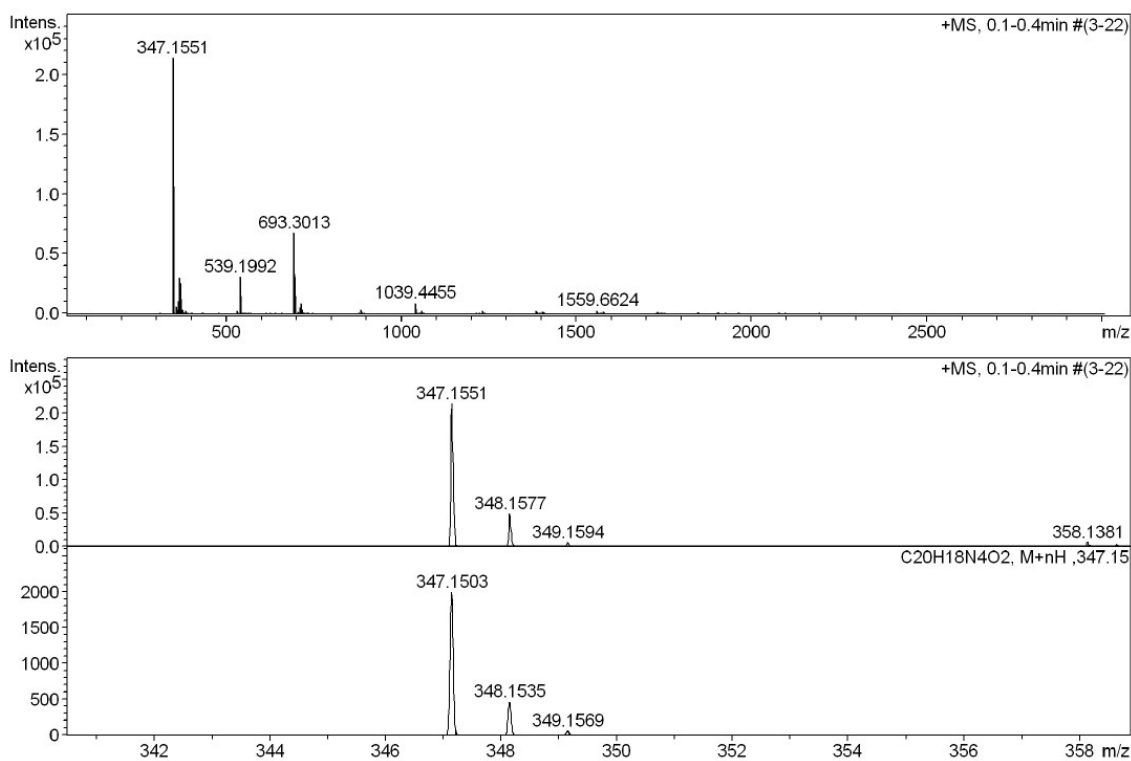

**Figure S5.** ESI-MS spectrum of  $[\text{CoL}_2]\text{Bu}_4\text{N}$ 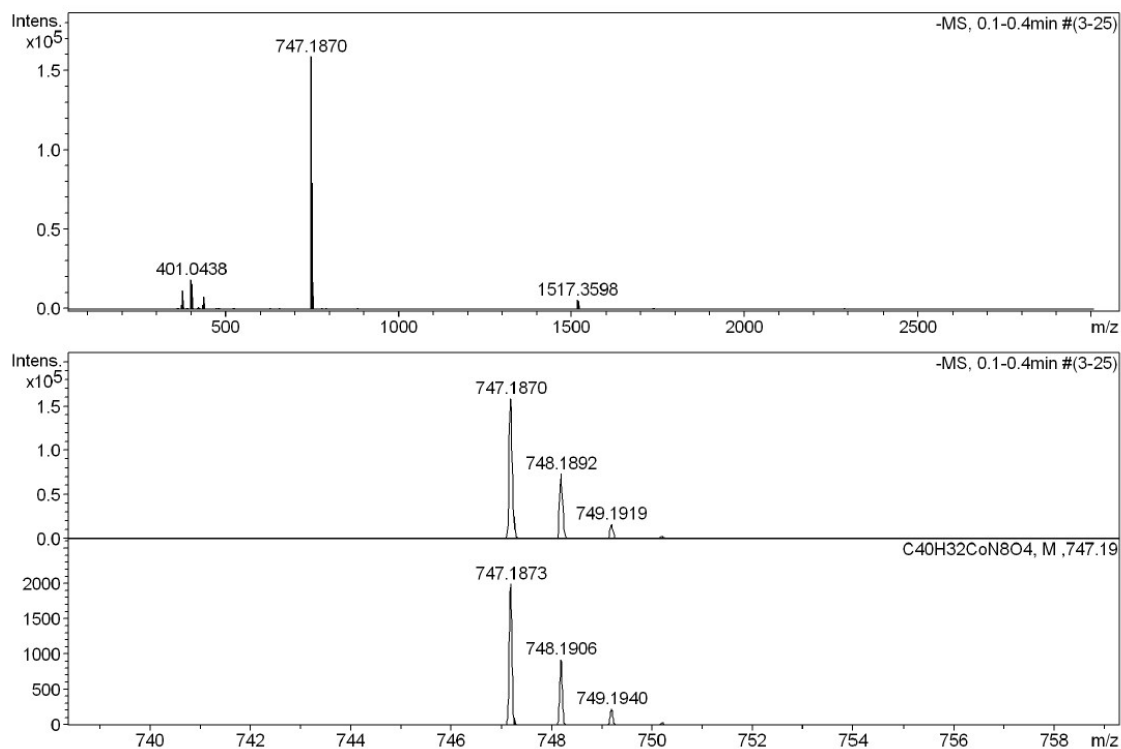**Table S2.** Bond lengths and Bond angles of  $[\text{CoL}_2]\text{Bu}_4\text{N}$ , **3**

| Bond lengths         |           | Bond angles         |            |
|----------------------|-----------|---------------------|------------|
| C(1)-N(2)            | 1.354(5)  | N(2)-C(1)-C(2)      | 121.1(4)   |
| C(2)-N(1)            | 1.330(4)  | N(1)-C(2)-C(3)      | 112.5(3)   |
| C(2)-C(3)            | 1.515(6)  | N(3)-C(3)-C(2)      | 110.0(3)   |
| C(3)-O(1)            | 1.233(4)  | N(3)-C(4)-C(5)      | 113.9(3)   |
| C(5)-C(6)            | 1.377(7)  | N(1)#5-Co(1)-N(3)#6 | 81.21(8)   |
| C(5)-C(10)           | 1.390(7)  | N(1)-Co(1)-N(3)#6   | 98.79(8)   |
| C(6)-C(7)            | 1.381(7)  | N(1)#5-Co(1)-N(3)#5 | 81.21(8)   |
| C(7)-C(8)            | 1.343(13) | N(3)#6-Co(1)-N(3)#5 | 162.43(16) |
| C(8)-C(9)            | 1.415(14) | N(1)-Co(1)-N(3)     | 81.21(8)   |
| C(9)-C(10)           | 1.404(9)  | N(3)#5-Co(1)-N(3)   | 91.34(2)   |
| C(11)-C(12)          | 1.485(8)  | N(3)#6-Co(1)-N(3)#1 | 91.34(2)   |
| C(11)-N(4)           | 1.518(5)  | N(3)#5-Co(1)-N(3)#1 | 91.34(2)   |
| C(12)-C(13)          | 1.461(9)  | C(1)-C(2)-C(3)      | 128.2(4)   |
| C(13)-C(14)          | 1.343(10) | C(6)-C(5)-C(10)     | 119.7(4)   |
| N(1)-C(2)#1          | 1.330(4)  | C(8)-C(7)-C(6)      | 121.7(7)   |
| N(3)-Co(1)           | 1.959(3)  | C(7)-C(8)-C(9)      | 118.9(6)   |
| N(4)-C(11)#4         | 1.518(5)  | C(10)-C(9)-C(8)     | 120.0(7)   |
| Co(1)-N(3)#5         | 1.959(3)  | C(5)-C(10)-C(9)     | 119.1(7)   |
| C(1)#1-N(2)-C(1)     | 117.9(5)  | C(13)-C(12)-C(11)   | 114.6(6)   |
| C(11)#2-N(4)-C(11)#3 | 112.2(5)  | C(14)-C(13)-C(12)   | 129.0(10)  |

|                      |          |                   |          |
|----------------------|----------|-------------------|----------|
| C(11)#2-N(4)-C(11)#4 | 108.1(2) | C(2)-N(1)-C(2)#1  | 121.5(4) |
| C(11)-N(4)-C(11)#4   | 112.2(5) | C(2)-N(1)-Co(1)   | 119.3(2) |
| C(11)#3-N(4)-C(11)#4 | 108.1(2) | C(2)#1-N(1)-Co(1) | 119.3(2) |
| O(1)-C(3)-N(3)       | 129.3(4) | C(1)#1-N(2)-C(1)  | 117.9(5) |
| O(1)-C(3)-C(2)       | 120.6(4) | C(3)-N(3)-C(4)    | 117.3(3) |

Symmetry transformations used to generate equivalent atoms:

#1: -x+1,-y,z #2: -y+1/2,x+1/2,-z+1/2 #3: y-1/2,-x+1/2,-z+1/2 #4: -x,-y+1,z

#5: y+1/2,-x+1/2,-z+1/2 #6: -y+1/2,x-1/2,-z+1/2

**Table S3. Bond lengths and Bond angles of 4**

| Bond lengths |          | Bond angles        |            |
|--------------|----------|--------------------|------------|
| C(1)-N(1)    | 1.336(3) | N(1)-C(1)-C(2)     | 118.7(3)   |
| C(1)-C(2)    | 1.379(4) | N(1)-C(1)-C(6)     | 111.8(2)   |
| C(1)-C(6)    | 1.503(4) | N(2)-C(2)-C(1)     | 121.5(3)   |
| C(3)-N(1)    | 1.334(3) | N(1)-C(3)-C(5)     | 113.0(2)   |
| C(3)-C(4)    | 1.382(4) | N(2)-C(4)-C(3)     | 121.7(3)   |
| C(4)-N(2)    | 1.337(4) | N(6)-C(5)-C(3)     | 110.9(2)   |
| C(5)-O(2)    | 1.249(3) | N(3)-C(7)-C(11)    | 112.2(2)   |
| C(5)-N(6)    | 1.327(3) | N(3)-C(7)-C(10)    | 118.0(3)   |
| C(6)-O(1)    | 1.237(3) | N(3)-C(8)-C(9)     | 118.1(3)   |
| C(6)-N(5)    | 1.335(4) | N(3)-C(8)-C(12)    | 112.4(2)   |
| C(7)-N(3)    | 1.331(4) | N(4)-C(9)-C(8)     | 121.9(3)   |
| C(7)-C(11)   | 1.487(4) | N(4)-C(10)-C(7)    | 122.1(3)   |
| C(8)-C(9)    | 1.387(4) | N(7)-C(11)-C(7)    | 112.3(2)   |
| C(8)-C(12)   | 1.500(4) | N(8)-C(12)-C(8)    | 110.4(3)   |
| C(9)-N(4)    | 1.338(4) | N(7)-C(14)-C(15)   | 117.8(2)   |
| C(12)-O(3)   | 1.236(4) | N(5)-C(28)-C(29)   | 113.5(2)   |
| C(14)-C(15)  | 1.504(4) | N(8)-C(35)-C(36)   | 114.0(3)   |
| C(15)-C(20)  | 1.371(5) | N(1)-Co(1)-N(3)    | 175.58(10) |
| C(15)-C(16)  | 1.385(5) | N(1)-Co(1)-N(5)    | 81.39(10)  |
| C(16)-C(17)  | 1.372(5) | N(3)-Co(1)-N(5)    | 102.34(10) |
| C(17)-C(18)  | 1.342(7) | N(3)-Co(1)-N(8)    | 81.08(10)  |
| C(18)-C(119) | 1.377(7) | N(1)-Co(1)-N(7)    | 96.22(10)  |
| C(20)-C(119) | 1.386(6) | N(5)-Co(1)-N(7)    | 89.93(10)  |
| C(21)-N(6)   | 1.459(3) | N(1)-Co(1)-N(6)    | 81.34(10)  |
| C(21)-C(22)  | 1.509(4) | N(3)-Co(1)-N(6)    | 95.03(10)  |
| C(22)-C(23)  | 1.372(5) | N(7)-Co(1)-N(6)    | 94.39(10)  |
| C(22)-C(27)  | 1.391(5) | N(2)#4-Ag(1)-C(32) | 112.13(14) |
| C(23)-C(24)  | 1.387(5) | N(2)#4-Ag(1)-C(33) | 89.16(12)  |
| C(26)-C(27)  | 1.386(6) | C(9)-C(8)-C(12)    | 129.5(3)   |
| C(29)-C(30)  | 1.382(4) | C(16)-C(15)-C(14)  | 118.9(3)   |
| C(29)-C(34)  | 1.385(4) | C(17)-C(16)-C(15)  | 121.4(4)   |
| C(31)-C(32)  | 1.366(6) | C(18)-C(17)-C(16)  | 119.3(4)   |
| C(32)-Ag(1)  | 2.527(4) | C(17)-C(18)-C(119) | 121.1(4)   |
| C(33)-Ag(1)  | 2.658(5) | C(15)-C(20)-C(119) | 119.9(4)   |
| C(36)-C(41)  | 1.375(5) | C(27)-C(22)-C(21)  | 119.3(3)   |
| C(36)-C(37)  | 1.383(5) | C(22)-C(23)-C(24)  | 120.9(4)   |
| C(38)-C(39)  | 1.342(7) | C(25)-C(24)-C(23)  | 119.9(5)   |



|                    |            |                     |            |
|--------------------|------------|---------------------|------------|
| N(2)-Ag(1)#1       | 2.381(2)   | C(26)-C(27)-C(22)   | 120.0(4)   |
| N(8)-Co(1)         | 1.952(2)   | C(30)-C(29)-C(34)   | 118.4(3)   |
| O(2)-Ag(1)#2       | 2.312(2)   | C(30)-C(29)-C(28)   | 120.4(3)   |
| O(4)-Ag(1)         | 2.269(2)   | C(34)-C(29)-C(28)   | 121.1(3)   |
| Ag(1)-N(2)#4       | 2.381(2)   | C(32)-C(31)-C(30)   | 119.9(4)   |
|                    |            | C(31)-C(32)-C(33)   | 120.0(4)   |
| <b>Bond Angles</b> |            | C(31)-C(32)-Ag(1)   | 103.2(3)   |
| C(36)-C(41)-C(40)  | 119.9(4)   | C(34)-C(33)-Ag(1)   | 107.3(2)   |
| C(18)-C(119)-C(20) | 119.7(4)   | C(29)-C(34)-C(33)   | 119.6(4)   |
| C(1)-N(1)-Co(1)    | 119.62(19) | C(41)-C(36)-C(37)   | 119.3(3)   |
| C(4)-N(2)-C(2)     | 118.1(3)   | C(41)-C(36)-C(35)   | 121.1(3)   |
| C(4)-N(2)-Ag(1)#1  | 112.83(19) | C(37)-C(36)-C(35)   | 119.6(3)   |
| C(2)-N(2)-Ag(1)#1  | 127.22(19) | C(38)-C(37)-C(36)   | 119.9(4)   |
| C(7)-N(3)-Co(1)    | 118.35(19) | C(39)-C(38)-C(37)   | 121.1(4)   |
| C(6)-N(5)-Co(1)    | 116.49(18) | C(38)-C(39)-C(40)   | 119.9(4)   |
| C(28)-N(5)-Co(1)   | 125.69(19) | O(2)-C(5)-N(6)      | 130.2(3)   |
| C(5)-N(6)-C(21)    | 117.5(2)   | O(2)-C(5)-C(3)      | 118.9(2)   |
| C(5)-N(6)-Co(1)    | 115.81(18) | O(1)-C(6)-N(5)      | 127.9(3)   |
| C(21)-N(6)-Co(1)   | 126.34(18) | O(1)-C(6)-C(1)      | 121.4(3)   |
| C(11)-N(7)-C(14)   | 116.6(2)   | O(4)-C(11)-N(7)     | 127.5(3)   |
| C(11)-N(7)-Co(1)   | 114.93(19) | O(4)-C(11)-C(7)     | 120.1(3)   |
| C(14)-N(7)-Co(1)   | 125.67(18) | O(3)-C(12)-N(8)     | 129.1(3)   |
| C(12)-N(8)-C(35)   | 118.0(3)   | O(3)-C(12)-C(8)     | 120.4(3)   |
| C(12)-N(8)-Co(1)   | 116.69(19) | O(4)-Ag(1)-O(2)#3   | 106.73(8)  |
| C(35)-N(8)-Co(1)   | 124.5(2)   | O(4)-Ag(1)-N(2)#4   | 117.74(9)  |
| C(5)-O(2)-Ag(1)#2  | 144.55(19) | O(2)#3-Ag(1)-N(2)#4 | 94.14(8)   |
| C(11)-O(4)-Ag(1)   | 119.96(18) | O(4)-Ag(1)-C(32)    | 116.88(11) |
| C(32)-Ag(1)-C(33)  | 30.58(14)  | O(2)#3-Ag(1)-C(32)  | 105.62(12) |

Symmetry transformations used to generate equivalent atoms:

#1:  $x-1/2, -y+1/2, z-1/2$  #2:  $-x+3/2, y-1/2, -z+3/2$  #3:  $-x+3/2, y+1/2, -z+3/2$  #4:  $x+1/2, -y+1/2, z+1/2$

**Table S4. Bond lengths and Bond angles of 5**

| Bond lengths |           | Bond angles       |          |
|--------------|-----------|-------------------|----------|
| C(13)-N(5)   | 1.451(6)  | N(5)-C(13)-C(14)  | 114.6(4) |
| C(15)-C(16)  | 1.365(10) | C(19)-C(14)-C(15) | 119.4(6) |
| C(16)-C(17)  | 1.301(13) | C(15)-C(14)-C(13) | 119.3(5) |
| C(18)-C(19)  | 1.424(13) | C(17)-C(16)-C(15) | 120.1(8) |
| C(20)-N(7)   | 1.454(5)  | C(16)-C(17)-C(18) | 121.9(8) |
| C(22)-C(23)  | 1.382(9)  | C(14)-C(19)-C(18) | 117.9(9) |
| C(28)-C(29)  | 1.378(9)  | C(26)-C(21)-C(22) | 118.8(5) |
| C(28)-C(33)  | 1.385(8)  | C(26)-C(21)-C(20) | 120.8(5) |
| C(28)-C(27)  | 1.508(8)  | C(22)-C(21)-C(20) | 120.4(4) |
| C(29)-C(30)  | 1.382(10) | C(23)-C(22)-C(21) | 120.4(5) |
| C(32)-C(33)  | 1.398(11) | C(23)-C(24)-C(25) | 118.8(6) |
| C(34)-N(8)   | 1.461(6)  | C(24)-C(25)-C(26) | 121.0(6) |
| C(36)-C(37)  | 1.384(10) | C(29)-C(28)-C(33) | 118.3(6) |
| C(37)-C(38)  | 1.366(13) | C(33)-C(28)-C(27) | 121.2(6) |

|                     |            |                    |           |
|---------------------|------------|--------------------|-----------|
| C(39)-C(40)         | 1.396(12)  | C(31)-C(30)-C(29)  | 120.4(8)  |
| C(41)-C(42)         | 1.409(16)  | C(30)-C(31)-C(32)  | 120.2(8)  |
| N(9)-O(8)           | 1.238(7)   | N(8)-C(34)-C(35)   | 113.8(4)  |
| O(5)-Ag(3)          | 2.375(7)   | C(36)-C(35)-C(40)  | 119.3(6)  |
| O(5)-Ag(2)#2        | 2.469(7)   | C(36)-C(35)-C(34)  | 119.6(5)  |
| O(8)-Ag(1)          | 2.575(5)   | C(40)-C(35)-C(34)  | 121.0(6)  |
| O(9)-Ag(2)#3        | 2.446(5)   | C(35)-C(36)-C(37)  | 120.1(7)  |
| C(1)-C(5)           | 1.492(6)   | C(38)-C(37)-C(36)  | 120.2(9)  |
| C(3)-N(3)           | 1.338(6)   | C(39)-C(38)-C(37)  | 120.6(8)  |
| C(4)-N(4)           | 1.327(6)   | C(38)-C(39)-C(40)  | 120.4(8)  |
| C(5)-N(7)           | 1.335(6)   | C(35)-C(40)-C(39)  | 119.4(8)  |
| C(7)-C(8)           | 1.384(6)   | C(42)-C(41)-O(11)  | 109.2(11) |
| C(12)-N(6)          | 1.328(5)   | O(9)-N(9)-O(10)    | 122.5(6)  |
| C(27)-N(6)          | 1.462(6)   | O(9)-N(9)-O(8)     | 119.0(5)  |
| N(1)-Co(1)          | 1.846(3)   | O(6)-N(10)-O(5)    | 118.0(8)  |
| N(2)-Ag(3)#4        | 2.384(4)   | O(7)-N(10)-O(5)    | 119.0(7)  |
| N(3)-Co(1)          | 1.850(3)   | C(6)-O(2)-Ag(1)#1  | 127.1(3)  |
| N(4)-Ag(1)#5        | 2.385(4)   | N(10)-O(5)-Ag(3)   | 107.5(5)  |
| N(5)-Co(1)          | 1.955(4)   | N(10)-O(5)-Ag(2)#2 | 101.5(5)  |
| N(6)-Co(1)          | 1.958(4)   | Ag(3)-O(5)-Ag(2)#2 | 151.0(3)  |
| N(7)-Co(1)          | 1.967(4)   | N(9)-O(8)-Ag(1)    | 100.2(4)  |
| N(8)-Co(1)          | 1.958(4)   | N(9)-O(9)-Ag(2)#3  | 105.8(4)  |
| Ag(1)-O(2)#6        | 2.316(4)   | N(3)-C(1)-C(2)     | 118.1(4)  |
| Ag(1)-O(1)          | 2.346(4)   | N(3)-C(1)-C(5)     | 113.3(4)  |
| Ag(1)-N(4)#5        | 2.385(4)   | C(2)-C(1)-C(5)     | 128.5(4)  |
| Ag(2)-O(3)          | 2.247(4)   | N(4)-C(2)-C(1)     | 121.4(4)  |
| Ag(3)-O(4)          | 2.322(3)   | N(3)-C(3)-C(4)     | 118.1(4)  |
| Ag(3)-N(2)#4        | 2.384(4)   | N(3)-C(3)-C(6)     | 111.8(4)  |
| Bond angles         |            | N(4)-C(4)-C(3)     | 121.6(4)  |
| C(6)-N(8)-C(34)     | 117.2(4)   | O(1)-C(5)-N(7)     | 129.6(4)  |
| C(6)-N(8)-Co(1)     | 116.6(3)   | O(1)-C(5)-C(1)     | 119.5(4)  |
| C(34)-N(8)-Co(1)    | 126.1(3)   | N(7)-C(5)-C(1)     | 110.9(4)  |
| N(1)-Co(1)-N(3)     | 179.28(17) | O(2)-C(6)-N(8)     | 128.3(4)  |
| N(1)-Co(1)-N(5)     | 81.32(16)  | O(2)-C(6)-C(3)     | 120.6(4)  |
| N(3)-Co(1)-N(5)     | 98.12(16)  | N(8)-C(6)-C(3)     | 111.2(4)  |
| N(1)-Co(1)-N(8)     | 98.49(16)  | N(1)-C(7)-C(8)     | 118.4(4)  |
| N(3)-Co(1)-N(8)     | 81.05(15)  | N(1)-C(7)-C(11)    | 112.2(4)  |
| N(5)-Co(1)-N(8)     | 92.36(16)  | C(8)-C(7)-C(11)    | 129.3(4)  |
| N(1)-Co(1)-N(6)     | 81.57(15)  | N(2)-C(8)-C(7)     | 121.1(5)  |
| N(8)-Co(1)-N(6)     | 90.97(16)  | N(1)-C(9)-C(10)    | 117.3(4)  |
| N(1)-Co(1)-N(7)     | 98.97(16)  | N(1)-C(9)-C(12)    | 113.0(4)  |
| N(3)-Co(1)-N(7)     | 81.50(15)  | C(10)-C(9)-C(12)   | 129.7(4)  |
| N(5)-Co(1)-N(7)     | 90.87(16)  | N(2)-C(10)-C(9)    | 122.2(4)  |
| O(2)#6-Ag(1)-O(1)   | 103.53(13) | O(3)-C(11)-N(5)    | 127.7(4)  |
| O(2)#6-Ag(1)-N(4)#5 | 132.37(14) | O(3)-C(11)-C(7)    | 121.0(4)  |
| O(1)-Ag(1)-N(4)#5   | 87.58(13)  | N(5)-C(11)-C(7)    | 111.3(4)  |
| O(2)#6-Ag(1)-O(8)   | 102.85(16) | O(4)-C(12)-N(6)    | 130.0(4)  |
| O(1)-Ag(1)-O(8)     | 130.77(17) | O(4)-C(12)-C(9)    | 118.9(4)  |
| N(4)#5-Ag(1)-O(8)   | 103.84(17) | N(6)-C(12)-C(9)    | 111.1(4)  |

|                   |            |                    |          |
|-------------------|------------|--------------------|----------|
| O(3)-Ag(2)-O(9)#7 | 119.73(16) | N(6)-C(27)-C(28)   | 113.1(4) |
| C(5)-O(1)-Ag(1)   | 144.0(3)   | C(7)-N(1)-C(9)     | 122.4(4) |
| C(11)-O(3)-Ag(2)  | 131.9(3)   | C(7)-N(1)-Co(1)    | 119.4(3) |
| C(12)-O(4)-Ag(3)  | 140.4(3)   | C(9)-N(1)-Co(1)    | 118.2(3) |
| C(12)-N(6)-C(27)  | 118.7(4)   | C(10)-N(2)-C(8)    | 118.6(4) |
| C(12)-N(6)-Co(1)  | 116.0(3)   | C(10)-N(2)-Ag(3)#4 | 116.6(3) |
| C(27)-N(6)-Co(1)  | 125.3(3)   | C(8)-N(2)-Ag(3)#4  | 124.8(3) |
| C(5)-N(7)-C(20)   | 118.4(4)   | C(1)-N(3)-C(3)     | 122.2(4) |
| C(5)-N(7)-Co(1)   | 115.6(3)   | C(1)-N(3)-Co(1)    | 118.5(3) |
| C(11)-N(5)-C(13)  | 117.1(4)   | C(3)-N(3)-Co(1)    | 119.2(3) |
| C(11)-N(5)-Co(1)  | 115.7(3)   | C(4)-N(4)-C(2)     | 118.6(4) |
| C(13)-N(5)-Co(1)  | 126.6(3)   | C(4)-N(4)-Ag(1)#5  | 126.1(3) |
|                   |            | C(2)-N(4)-Ag(1)#5  | 115.1(3) |

Symmetry transformations used to generate equivalent atoms:

#1: x+1,y,z #2: x+1,y-1,z #3: x,y-1,z #4: -x+1,-y+1,-z+1 #5: -x+1,-y+1,-z

#6: x-1,y,z #7: x,y+1,z #8: x-1,y+1,z

**Table S5. Bond lengths and Bond angles of 6**

| Bond lengths |           | Bond angles       |          |
|--------------|-----------|-------------------|----------|
| C(1)-N(1)    | 1.324(8)  | N(1)-C(1)-C(2)    | 122.0(5) |
| C(2)-N(2)    | 1.322(7)  | N(2)-C(2)-C(1)    | 118.0(5) |
| C(2)-C(9)    | 1.499(8)  | N(2)-C(2)-C(9)    | 113.0(4) |
| C(3)-N(2)    | 1.328(7)  | C(1)-C(2)-C(9)    | 128.7(5) |
| C(3)-C(4)    | 1.398(8)  | N(2)-C(3)-C(4)    | 116.6(5) |
| C(3)-C(10)   | 1.497(8)  | N(2)-C(3)-C(10)   | 113.0(5) |
| C(4)-N(1)    | 1.329(8)  | C(4)-C(3)-C(10)   | 130.3(5) |
| C(5)-C(11)   | 1.499(8)  | N(3)-C(5)-C(6)    | 118.2(5) |
| C(6)-N(4)    | 1.330(8)  | N(3)-C(5)-C(11)   | 111.7(5) |
| C(7)-N(3)    | 1.330(7)  | N(4)-C(6)-C(5)    | 121.9(6) |
| C(8)-N(4)    | 1.329(8)  | N(3)-C(7)-C(8)    | 117.6(5) |
| C(9)-O(1)    | 1.247(7)  | C(8)-C(7)-C(12)   | 130.0(5) |
| C(9)-N(7)    | 1.332(7)  | N(4)-C(8)-C(7)    | 122.6(6) |
| C(11)-O(4)   | 1.253(7)  | O(1)-C(9)-N(7)    | 128.0(5) |
| C(11)-N(8)   | 1.320(7)  | O(1)-C(9)-C(2)    | 120.8(5) |
| C(12)-O(3)   | 1.251(6)  | N(7)-C(9)-C(2)    | 111.1(4) |
| C(12)-N(6)   | 1.330(7)  | O(2)-C(10)-N(5)   | 128.1(5) |
| C(13)-N(6)   | 1.456(7)  | O(2)-C(10)-C(3)   | 121.0(5) |
| C(13)-C(17)  | 1.505(8)  | N(5)-C(10)-C(3)   | 110.9(4) |
| C(14)-N(8)   | 1.468(7)  | N(8)-C(11)-C(5)   | 111.9(5) |
| C(14)-C(23)  | 1.505(8)  | O(3)-C(12)-N(6)   | 127.6(5) |
| C(15)-N(5)   | 1.460(7)  | N(6)-C(13)-C(17)  | 114.4(4) |
| C(19)-C(20)  | 1.357(10) | N(5)-C(15)-C(29)  | 114.5(4) |
| C(26)-C(27)  | 1.389(11) | C(22)-C(17)-C(13) | 122.0(5) |
| C(27)-C(28)  | 1.367(10) | C(19)-C(18)-C(17) | 120.4(6) |
| C(29)-C(30)  | 1.377(8)  | C(20)-C(19)-C(18) | 120.1(6) |
| C(32)-C(33)  | 1.359(11) | C(20)-C(21)-C(22) | 119.9(6) |

|                  |            |                   |          |
|------------------|------------|-------------------|----------|
| C(35)-C(40)      | 1.381(8)   | C(24)-C(23)-C(28) | 117.7(6) |
| C(36)-C(37)      | 1.397(9)   | C(24)-C(23)-C(14) | 119.6(5) |
| C(37)-C(38)      | 1.378(10)  | C(25)-C(24)-C(23) | 120.9(7) |
| N(2)-Co          | 1.849(4)   | C(27)-C(28)-C(23) | 121.0(7) |
| N(6)-Co          | 1.977(4)   | C(30)-C(29)-C(34) | 118.7(6) |
| N(7)-Co          | 1.962(4)   | C(30)-C(29)-C(15) | 122.1(5) |
| N(8)-Co          | 1.963(4)   | C(34)-C(29)-C(15) | 119.2(5) |
| N(9)-Ag(2)       | 2.086(7)   | C(31)-C(30)-C(29) | 120.7(6) |
| N(3)-Co-N(2)     | 178.95(19) | C(33)-C(34)-C(29) | 120.2(6) |
| N(3)-Co-N(7)     | 97.34(18)  | C(36)-C(35)-C(40) | 119.5(6) |
| N(2)-Co-N(7)     | 81.71(18)  | C(36)-C(35)-C(16) | 121.9(5) |
| N(5)-Co-N(7)     | 163.65(18) | C(40)-C(35)-C(16) | 118.5(5) |
| N(3)-Co-N(8)     | 81.55(18)  | C(35)-C(36)-C(37) | 120.2(6) |
| N(7)-Co-N(8)     | 91.49(18)  | C(38)-C(37)-C(36) | 120.2(6) |
| N(5)-Co-N(6)     | 90.09(18)  | C(39)-C(38)-C(37) | 119.1(7) |
| N(9)-Ag(2)-O(8)  | 176.2(3)   | C(38)-C(39)-C(40) | 121.0(7) |
| C(12)-N(6)-Co    | 114.7(4)   | N(9)-C(42)-C(41)  | 178.1(7) |
| C(13)-N(6)-Co    | 126.2(4)   | C(1)-N(1)-C(4)    | 117.7(5) |
| C(9)-N(7)-C(16)  | 116.8(4)   | C(2)-N(2)-C(3)    | 123.0(5) |
| C(9)-N(7)-Co     | 115.4(4)   | C(2)-N(2)-Co      | 118.7(4) |
| C(16)-N(7)-Co    | 126.5(4)   | C(3)-N(2)-Co      | 118.2(4) |
| C(11)-N(8)-C(14) | 117.7(4)   | C(7)-N(3)-C(5)    | 121.7(5) |
| C(11)-N(8)-Co    | 115.7(4)   | C(7)-N(3)-Co      | 119.1(4) |
| C(14)-N(8)-Co    | 125.6(4)   | C(5)-N(3)-Co      | 119.2(4) |
| C(42)-N(9)-Ag(2) | 175.5(7)   | C(8)-N(4)-C(6)    | 117.8(5) |
